# Supplementary material for: Aggregatibacter, a Low Abundance Pathobiont That Influences Biogeography, Microbial Dysbiosis, and Host Defense Capabilities in Periodontitis: The History of a Bug, and Localization of Disease
Source: PubMed Central journal article supplement (PMC7157720; doi:10.3390/pathogens9030179), 2020-03-02
Supplement: pathogens-09-00179-s001.pdf [file pathogens-09-00179-s001.pdf]

Table S1: Selected Oral Bacteria found at distant sites related to extra-oral diseases

| Oral Species                                                                          | Extra-Oral Site      | References |
|---------------------------------------------------------------------------------------|----------------------|------------|
| <i>A. actinomycetemcomitans</i><br><i>P. gingivalis</i><br><i>Streptococcal spp.</i>  | Heart Tissue         | [1-3]      |
| <i>A. actinomycetemcomitans</i><br><i>P. gingivalis</i><br><i>Tanerella forsythia</i> | Rheumatoid Arthritis | [4,5]      |
| <i>P. gingivalis</i>                                                                  | Alzheimer's Disease  | [6]        |
| <i>Fusobacterium necrophorum</i><br><i>F. nucleatum</i>                               | Appendicitis         | [7,8]      |
| <i>F. nucleatum</i><br><i>P. gingivalis</i>                                           | Preterm Birth        | [9,10]     |
| <i>F. nucleatum</i>                                                                   | Colorectal cancer    | [11-13]    |

#### References:

1. Fiehn, N.-E.; Larsen, T.; Christiansen, N.; Holmstrup, P.; Schroeder, T. V. Identification of Periodontal Pathogens in Atherosclerotic Vessels. *J Periodontol.* **2005**, *76*, 731-736.
2. Haraszthy, V. I.; Zambon, J. J.; Trevisan, M.; Zeid, M.; Genco, R. J. Identification of Periodontal Pathogens in Atheromatous Plaques *J Periodontol.* **2000**, *71*, 1554-1560.
3. Figuero, E.; Sanchez-Beltran, M.; Cuesta-Frechoso, S.; Tejerina, J. M.; del Castro, J. A.; Gutierrez, J. M.; Herrera, D.; Sanz, M. Detection of Periodontal Bacteria in Atheromatous Plaque by Nested Polymerase Chain Reaction. *J Periodontol.* **2011**, *82*, 1469-1477.
4. Moen, K.; Brun, J. G.; Skartveit, L.; Ribs Eribe, E. K.; Olsen, I.; Jonsson, R. Synovial Inflammation in Active Rheumatoid Arthritis and Psoriatic Arthritis Facilitates Trapping of a Variety of Oral Bacterial DNA's. *Clin Exp Rheumatol.* **2006**, *24*, 656-663.
5. Gomez-Banuelos, E.; Mukherjee, A.; Darrah, E.; Andrade, F. Rheumatoid Arthritis-Associated Mechanisms of Porphyromonas gingivalis and Aggregatibacter actinomycetemcomitans. *J. Clin. Med.* **2019**, *8*, 1-24.
6. Dominy, S. S.; Lynch, C.; Ermini, F.; Benedyk, M.; Msrczyk, A.; Konradi, A.; Nguyen, M.; Haditsch, U.; Raha, D.; Griffin, C., et al. Porphyromonas gingivalis in Alzheimer's disease brains: Evidence for disease causation and treatment with small-molecule inhibitors. *Sci. Adv.* **2019**, *5*, 1-21.

7. Roblin, X.; Neut, C.; Darfeuille-Michaud, A.; Colombel, J. F. Local appendiceal dysbiosis: the missing link between the appendix and ulcerative colitis? *Gut*. **2012**, *61*, 635-636.
8. Swidsinski, J.; Dorffel, Y.; Loening-Baucke, V.; Theissig, F.; Ruckert, J. C.; Ismail, M.; al., e. Acute appendicitis is characterized by local invasion with *Fusobacterium nucleatum/necrophorum*. *Gut*. **2011**, *60*, 34-40.
9. Han, Y. W.; Redline, R. W.; Li, M.; Yin, L.; Hill, G. B.; McCormick, T. S. *Fusobacterium nucleatum* Induces Premature and Term Stillbirths in Pregnant Mice: Implication of Oral Bacteria in Preterm Birth. *Infect Immun*. **2004**, *72*, 2272-2279.
10. Katz, J.; Chegini, N.; Shiverick, K. T.; Lamont, R. J. Localization of *P. gingivalis* in preterm delivery placenta. *J Dent Res*. **2009**, *88*, 575-578.
11. Han, Y. W.; Ikegami, A.; Rajanna, C.; Kawsar, H. I.; Zhou, Y.; Li, M.; Sojar, H. T.; Genco, R. J.; Kuramitsu, H. K.; Deng, C. X. Identification and characterization of a novel adhesin unique to oral fusobacteria. *J Bacteriol*. **2005**, *187*, 5330—5340.
12. Kelly, D.; Yang, L.; Zhiheng, P. Gut Microbiota, Fusobacteria, and Colorectal Cancer. *Diseases*. **2018**, *6*, 1-16.
13. Lee, S. A.; Liu, F.; Riordan, S. M.; C.S., L.; Zhang, L. Global Investigations of *Fusobacterium nucleatum* in Human Colorectal Cancer. *Front Oncol*. **2019**, *9*, 1-11.
